# Supplementary material for: Prognostic Value of Time-Weighted Average Glucose on All- Cause Mortality in Critically Ill Patients with Ischemic Stroke: A Retrospective Cohort Analysis
Source: Research Square preprint supplement (doi:10.21203/rs.3.rs-7573088/v1), 2025-10-27
Supplement: Supplementary file 1 [file 1a93b9f0d487e1b2235aafb7.docx]

**Supplementary material**

**Table S1 Missing variables and their percentages**

| Column | Missing Percentage (%) |
| --- | --- |
| PTT | 7.1 |
| INR | 7.03 |
| PT | 7.03 |
| Urine output | 3.41 |
| Temperature | 3.34 |
| RR | 0.43 |
| RBC | 0.43 |
| SBP | 0.36 |
| DBP | 0.36 |
| SOFA | 0.36 |
| GCS | 0.36 |
| WBC | 0.36 |
| Platelet | 0.36 |
| Heart Rate | 0.36 |
| Potassium | 0.07 |
| Sodium | 0.07 |
| BUN | 0.07 |
| Creatinine | 0.07 |

PPT: Partial thromboplastin time, INR: International normalized ratio, PT: Prothrombin time, RR: Respiratory Rate, RBC: Red blood cell count, WBC: White blood cell count, BUN: Blood urea nitrogen, SBP: Systolic blood pressure, DBP: Diastolic blood pressure, SOFA: Sequential organ failure assessment, GCS: Glasgow Coma Scale.

**Table S2 Univariable cox regression for 30-day all-cause mortality**

| **Variables** | ***P*** | **HR (95%CI)** |
| --- | --- | --- |
|
| Gender |  |  |
| Female |  | 1.00 (Reference) |
| Male | 0.576 | 1.06 (0.86 ~ 1.32) |
| Race |  |  |
| Other |  | 1.00 (Reference) |
| White | **<.001** | 0.64 (0.52 ~ 0.80) |
| Age | **<.001** | 1.02 (1.01 ~ 1.03) |
| Heart rate | **<.001** | 1.01 (1.01 ~ 1.02) |
| RR | **<.001** | 1.05 (1.03 ~ 1.07) |
| Temperature | 0.490 | 1.05 (0.91 ~ 1.23) |
| SOFA | 0.059 | 1.05 (1.00 ~ 1.11) |
| GCS | 0.375 | 0.98 (0.94 ~ 1.02) |
| LODS | **<.001** | 1.19 (1.16 ~ 1.23) |
| CCI | **<.001** | 1.13 (1.09 ~ 1.17) |
| Congestive heart failure |  |  |
| No |  | 1.00 (Reference) |
| Yes | 0.103 | 1.21 (0.96 ~ 1.51) |
| Diabetes |  |  |
| No |  | 1.00 (Reference) |
| Yes | 0.284 | 1.13 (0.90 ~ 1.42) |
| Hypertension |  |  |
| No |  | 1.00 (Reference) |
| Yes | **0.048** | 1.32 (1.01 ~ 1.74) |
| Rtpa |  |  |
| No |  | 1.00 (Reference) |
| Yes | 0.668 | 0.91 (0.61 ~ 1.38) |
| Insulin |  |  |
| No |  | 1.00 (Reference) |
| Yes | **0.005** | 1.37 (1.10 ~ 1.71) |
| WBC | **<.001** | 1.02 (1.01 ~ 1.03) |
| Potassium | **0.009** | 1.20 (1.05 ~ 1.37) |
| Sodium | 0.965 | 1.00 (0.98 ~ 1.02) |
| BUN | **<.001** | 1.01 (1.01 ~ 1.02) |
| Creatinine | 0.053 | 1.04 (1.00 ~ 1.09) |
| PT | **0.002** | 1.01 (1.01 ~ 1.02) |
| INR | **<.001** | 1.15 (1.07 ~ 1.24) |
| MV |  |  |
| No |  | 1.00 (Reference) |
| Yes | **0.001** | 1.60 (1.20 ~ 2.14) |

RR: Respiratory Rate, SOFA: Sequential organ failure assessment, GCS: Glasgow Coma Scale, LODS: Logistic Organ Dysfunction Score, CCI: Charlson Comorbidity Index, rt-PA: Recombinant Tissue Plasminogen Activator, WBC: White blood cell count, BUN: Blood urea nitrogen, PT: Prothrombin time, INR: International normalized ratio, MV: Mechanical Ventilation.
